# Supplementary material for: Control of glioma cell migration and invasiveness by GDF-15
Source: PubMed Central journal article supplement (PMC4884950; doi:10.18632/oncotarget.6816), 2016-01-04
Supplement: oncotarget-07-7732-s001.pdf [file oncotarget-07-7732-s001.pdf]

## SUPPLEMENTARY FIGURES AND TABLE

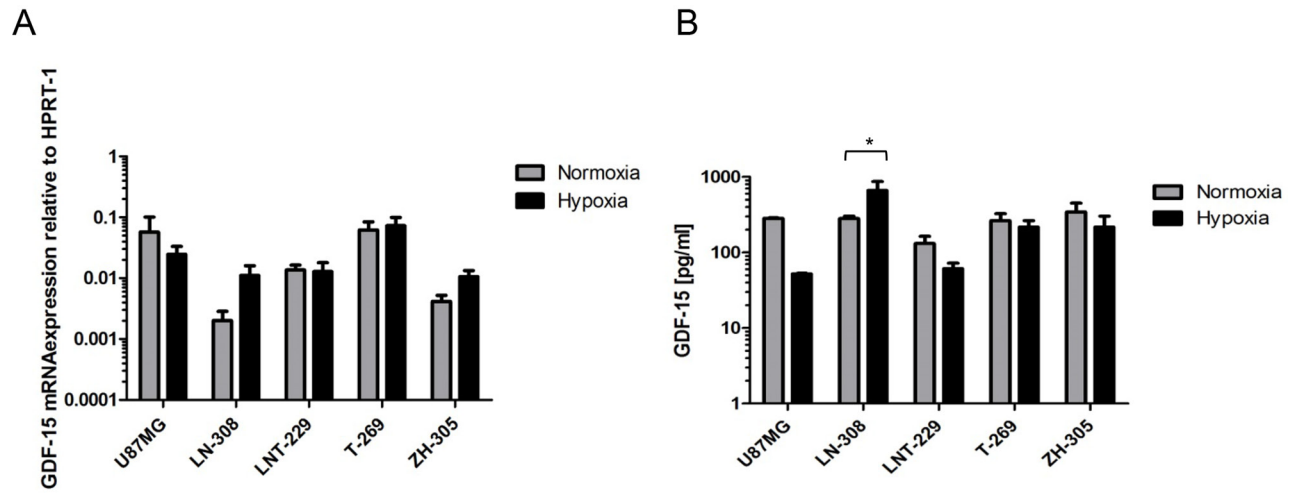

**Supplementary Figure S1: Effects of hypoxia on GDF-15 expression.** **A.** GDF-15 mRNA expression levels in a panel of LTC and GIC lines exposed to normoxia or hypoxia (1% O<sub>2</sub>) for 24 h were assessed by real-time PCR. **B.** GDF-15 protein levels in the supernatant of different glioma cell lines were assessed by ELISA after cell growth under normoxic or hypoxic conditions for 48 h (\*p < 0.05).

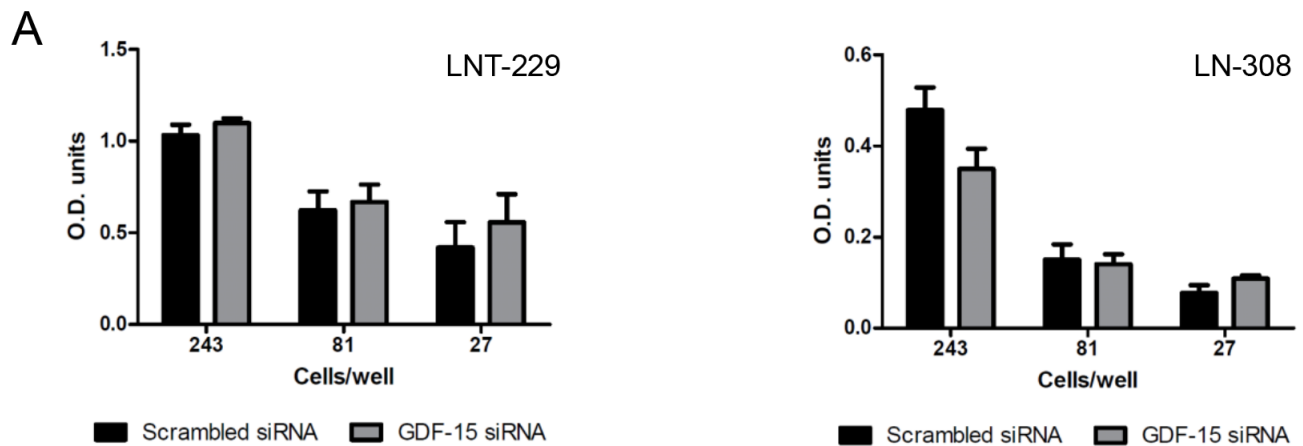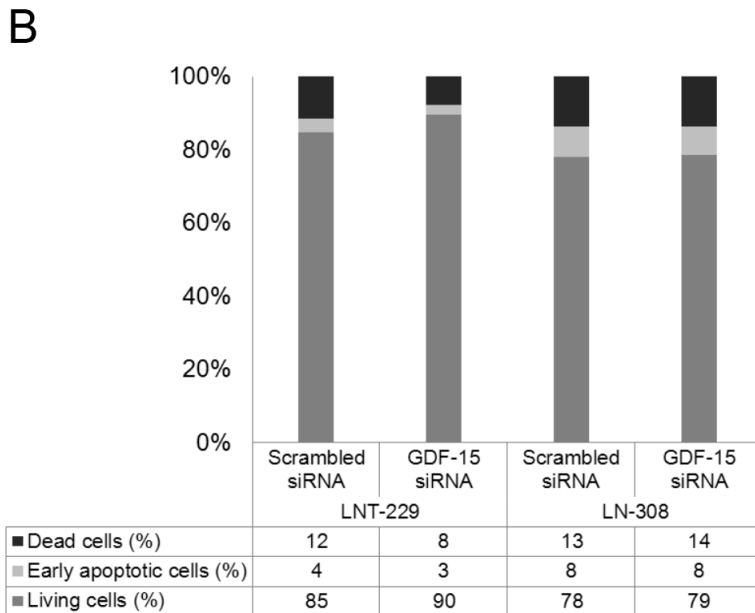

**Supplementary Figure S2: GDF-15 gene silencing has no effect on cell viability.** **A.** GDF-15-depleted or control cells were seeded in 96-well plates and allowed to grow 2–3 weeks in complete medium before colony formation was assessed by crystal violet staining. **B.** The viability of glioma cells with a silenced GDF-15 gene or control cells was assessed by flow cytometry using annexin V/PI staining 48 h after siRNA exposure.

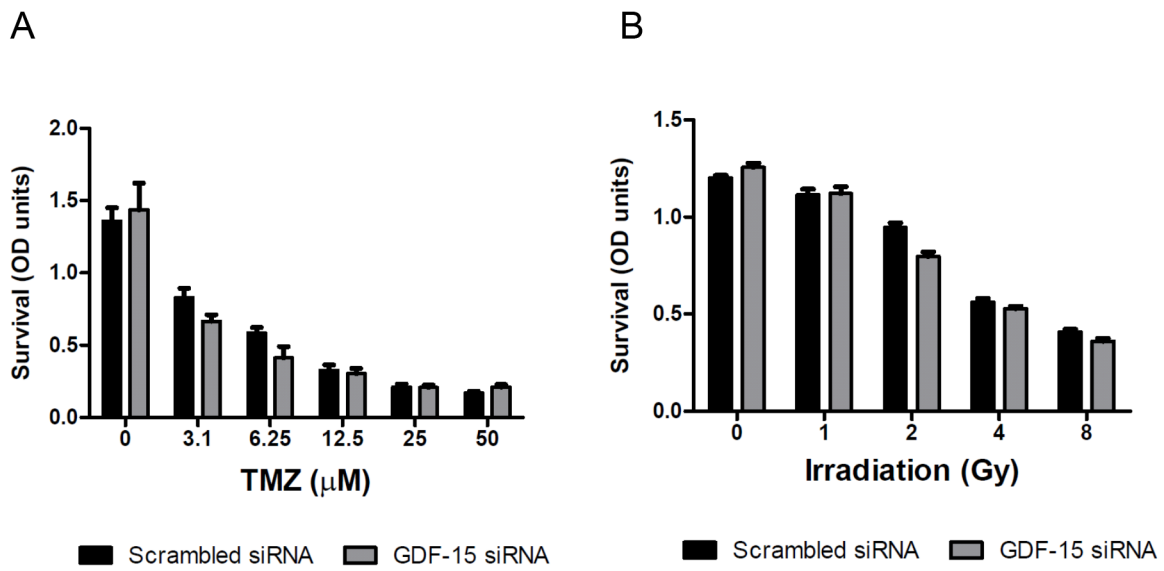

**Supplementary Figure S3: GDF-15 gene silencing has no effect on glioma cell sensitivity to TMZ or irradiation *in vitro*.** GDF-15-depleted or control LNT-229 cells were exposed to various concentrations of TMZ **A**, or irradiated at different doses **B**, as indicated. Subsequently, the cells were allowed to grow for 2–3 weeks and analyzed by crystal violet staining ( $*p < 0.05$ ;  $**p < 0.01$ ).

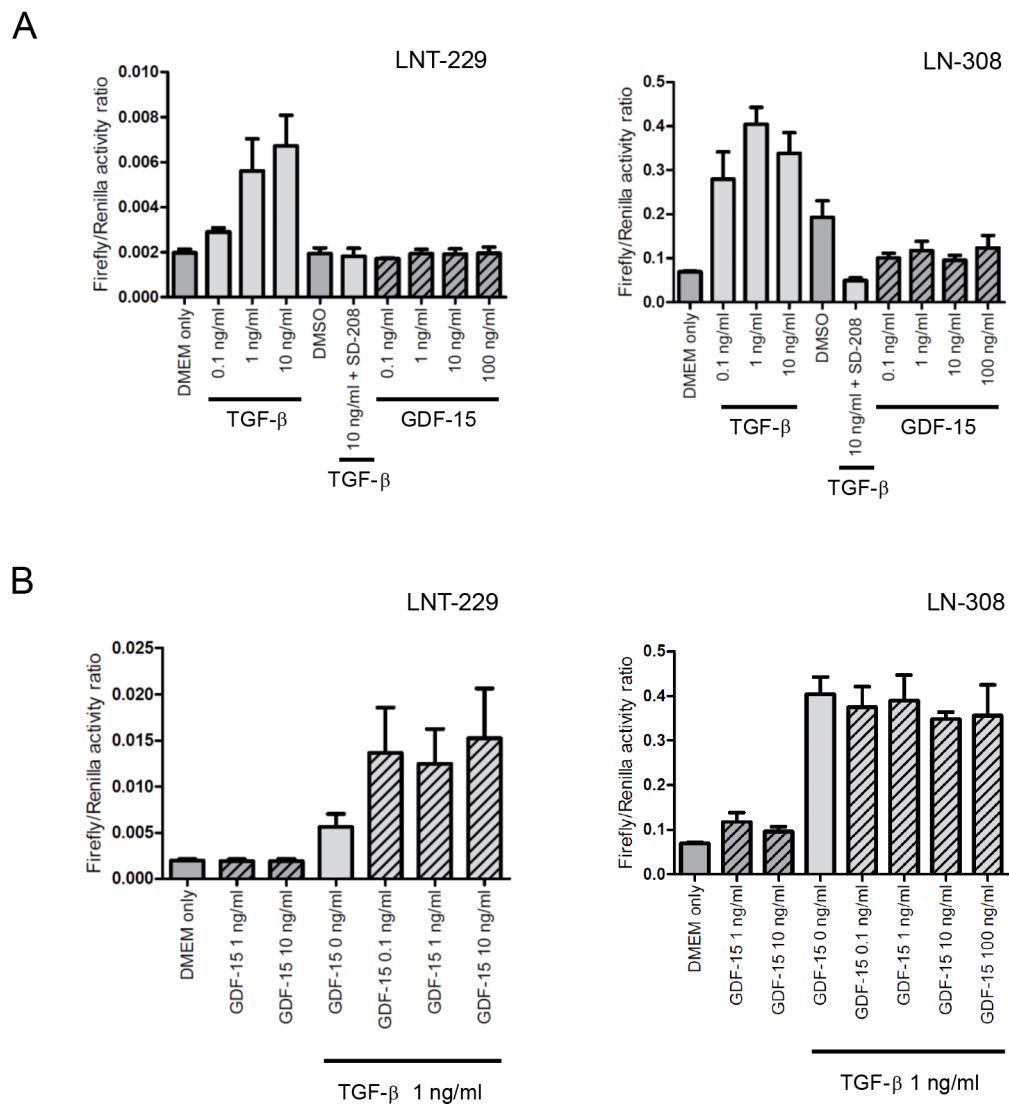

**Supplementary Figure S4: Effects of GDF-15 and TGF- $\beta$  on the p3TP-Lux reporter.** **A.** LNT-229 or LN-308 cells were transiently transfected with the p3TP-Lux reporter plasmid and exposed to TGF- $\beta_2$ , GDF-15, SD-208 or combinations thereof as indicated for 24 h and subsequently analyzed for firefly/renilla luciferase activity. **B.** LNT-229 or LN-308 cells were transiently transfected with the p3TP-Lux reporter plasmid, pre-exposed to GDF-15 as indicated for 1.5 h, treated with TGF- $\beta_2$  for 24 h and analyzed as in (A) (\* $p < 0.05$ ; \*\* $p < 0.01$ ).

**Supplementary Table S1: Changes in the miRNA expression profile in GDF-15-depleted glioma cells.** GDF-15-depleted LNT-229 and LN-308 were analyzed for their miRNA repertoire by deep sequencing and compared to control transfectants. The table shows logarithmic fold changes of GDF-15 knock-down (kd) versus control (ctrl) samples and read numbers as reads per million reads (rpm) over both biological replicates from either LNT-229 or LN-308 cells

**See Supplementary Table 1**
